# Supplementary material
Source: publisher site journal article supplement (https://www.spandidos-publications.com/1385/downloadSupplementary)
Supplement: Supplementary file 1 [file downloadSupplementary]

## Sheet: SCI(DMSO)vsSham.
Table SII. Gene Ontology enrichment analysis of upregulated genes in different groups.
GO_accession	Description	Term_type	Over_represented_pValue	Corrected_pValue	DEG_item	DEG_list	Bg_item	Bg_list	Gene_names
GO:0005488	binding	molecular_function	3.3838e-33	1.63e-29	1684	2462	15897	29496	ENSMUSG00000076431|ENSMUSG00000020097|ENSMUSG00000053158|ENSMUSG00000041124|ENSMUSG00000079111|ENSMUSG00000038552|ENSMUSG00000039367|ENSMUSG00000062960|ENSMUSG00000097194|ENSMUSG00000025006|ENSMUSG00000022367|ENSMUSG00000019256|ENSMUSG00000063727|ENSMUSG00000027293|ENSMUSG00000054404|ENSMUSG00000018932|ENSMUSG00000024727|ENSMUSG00000031976|ENSMUSG00000051341|ENSMUSG00000039239|ENSMUSG00000026832|…
GO:0005515	protein binding	molecular_function	5.1307e-27	1.2357e-23	933	2462	7713	29496	ENSMUSG00000031827|ENSMUSG00000046688|ENSMUSG00000040850|ENSMUSG00000026031|ENSMUSG00000021904|ENSMUSG00000048960|ENSMUSG00000017774|ENSMUSG00000039167|ENSMUSG00000040152|ENSMUSG00000075510|ENSMUSG00000096472|ENSMUSG00000071350|ENSMUSG00000054277|ENSMUSG00000033364|ENSMUSG00000041827|ENSMUSG00000032125|ENSMUSG00000024810|ENSMUSG00000026029|ENSMUSG00000027007|ENSMUSG00000034101|ENSMUSG00000021108|…
GO:0043168	anion binding	molecular_function	9.2391e-13	1.4835e-09	379	2462	2854	29496	ENSMUSG00000004591|ENSMUSG00000020715|ENSMUSG00000024054|ENSMUSG00000032042|ENSMUSG00000020709|ENSMUSG00000020227|ENSMUSG00000026749|ENSMUSG00000064262|ENSMUSG00000022221|ENSMUSG00000040253|ENSMUSG00000054051|ENSMUSG00000026395|ENSMUSG00000029484|ENSMUSG00000031504|ENSMUSG00000005672|ENSMUSG00000006445|ENSMUSG00000035064|ENSMUSG00000018830|ENSMUSG00000028978|ENSMUSG00000003283|ENSMUSG00000031377|…
GO:0032553	ribonucleotide binding	molecular_function	4.2512e-12	4.638e-09	335	2462	2476	29496	ENSMUSG00000082292|ENSMUSG00000020826|ENSMUSG00000024782|ENSMUSG00000040565|ENSMUSG00000020437|ENSMUSG00000029641|ENSMUSG00000000386|ENSMUSG00000042042|ENSMUSG00000020075|ENSMUSG00000004677|ENSMUSG00000034936|ENSMUSG00000020407|ENSMUSG00000027177|ENSMUSG00000073563|ENSMUSG00000005514|ENSMUSG00000001416|ENSMUSG00000007411|ENSMUSG00000024691|ENSMUSG00000036854|ENSMUSG00000020929|ENSMUSG00000029710|…
GO:0001882	nucleoside binding	molecular_function	8.4751e-12	4.638e-09	332	2462	2464	29496	ENSMUSG00000008730|ENSMUSG00000021948|ENSMUSG00000017418|ENSMUSG00000018846|ENSMUSG00000025580|ENSMUSG00000042608|ENSMUSG00000029518|ENSMUSG00000038762|ENSMUSG00000047215|ENSMUSG00000025915|ENSMUSG00000007739|ENSMUSG00000053436|ENSMUSG00000040263|ENSMUSG00000040584|ENSMUSG00000044147|ENSMUSG00000059866|ENSMUSG00000056153|ENSMUSG00000025877|ENSMUSG00000005533|ENSMUSG00000027968|ENSMUSG00000043336|…
GO:0035639	purine ribonucleoside triphosphate binding	molecular_function	8.7524e-12	4.638e-09	328	2462	2429	29496	ENSMUSG00000027177|ENSMUSG00000073563|ENSMUSG00000001416|ENSMUSG00000007411|ENSMUSG00000024691|ENSMUSG00000036854|ENSMUSG00000020929|ENSMUSG00000028270|ENSMUSG00000029710|ENSMUSG00000030890|ENSMUSG00000024782|ENSMUSG00000082292|ENSMUSG00000020437|ENSMUSG00000040565|ENSMUSG00000029641|ENSMUSG00000042042|ENSMUSG00000000386|ENSMUSG00000020075|ENSMUSG00000034936|ENSMUSG00000020407|ENSMUSG00000004677|…
GO:0017076	purine nucleotide binding	molecular_function	9.044e-12	4.638e-09	333	2462	2475	29496	ENSMUSG00000020700|ENSMUSG00000020671|ENSMUSG00000028268|ENSMUSG00000023341|ENSMUSG00000029480|ENSMUSG00000020611|ENSMUSG00000021408|ENSMUSG00000017144|ENSMUSG00000060477|ENSMUSG00000032547|ENSMUSG00000041187|ENSMUSG00000017999|ENSMUSG00000022184|ENSMUSG00000027829|ENSMUSG00000070327|ENSMUSG00000020190|ENSMUSG00000016528|ENSMUSG00000037921|ENSMUSG00000006728|ENSMUSG00000009772|ENSMUSG00000001674|…
GO:0001883	purine nucleoside binding	molecular_function	9.6285e-12	4.638e-09	329	2462	2439	29496	ENSMUSG00000039831|ENSMUSG00000030249|ENSMUSG00000036894|ENSMUSG00000021701|ENSMUSG00000027722|ENSMUSG00000039501|ENSMUSG00000024042|ENSMUSG00000002948|ENSMUSG00000028646|ENSMUSG00000040661|ENSMUSG00000091549|ENSMUSG00000038612|ENSMUSG00000026836|ENSMUSG00000047735|ENSMUSG00000029920|ENSMUSG00000023852|ENSMUSG00000033885|ENSMUSG00000055994|ENSMUSG00000037851|ENSMUSG00000028678|ENSMUSG00000073555|…
GO:0032549	ribonucleoside binding	molecular_function	9.6285e-12	4.638e-09	329	2462	2439	29496	ENSMUSG00000038387|ENSMUSG00000058013|ENSMUSG00000040675|ENSMUSG00000029169|ENSMUSG00000034024|ENSMUSG00000009566|ENSMUSG00000046768|ENSMUSG00000070469|ENSMUSG00000072620|Novel00671|ENSMUSG00000058594|ENSMUSG00000036943|ENSMUSG00000073775|ENSMUSG00000018417|ENSMUSG00000031488|ENSMUSG00000001380|ENSMUSG00000020181|ENSMUSG00000059796|ENSMUSG00000012519|ENSMUSG00000004591|ENSMUSG00000032042|ENSMUSG0…
GO:0032550	purine ribonucleoside binding	molecular_function	9.6285e-12	4.638e-09	329	2462	2439	29496	ENSMUSG00000009376|ENSMUSG00000059248|ENSMUSG00000071644|ENSMUSG00000026083|ENSMUSG00000021959|ENSMUSG00000030047|ENSMUSG00000033191|ENSMUSG00000033220|ENSMUSG00000026848|ENSMUSG00000022781|ENSMUSG00000068882|ENSMUSG00000019478|ENSMUSG00000024782|ENSMUSG00000082292|ENSMUSG00000040565|ENSMUSG00000020437|ENSMUSG00000000386|ENSMUSG00000042042|ENSMUSG00000029641|ENSMUSG00000004677|ENSMUSG00000020407|…
GO:0032555	purine ribonucleotide binding	molecular_function	1.3974e-11	5.8858e-09	329	2462	2447	29496	ENSMUSG00000025877|ENSMUSG00000005533|ENSMUSG00000027968|ENSMUSG00000043336|ENSMUSG00000027852|ENSMUSG00000068039|ENSMUSG00000022836|ENSMUSG00000035828|ENSMUSG00000007739|ENSMUSG00000040584|ENSMUSG00000053436|ENSMUSG00000040263|ENSMUSG00000044147|ENSMUSG00000059866|ENSMUSG00000029518|ENSMUSG00000038762|ENSMUSG00000047215|ENSMUSG00000025915|ENSMUSG00000008730|ENSMUSG00000021948|ENSMUSG00000017418|…
GO:0097367	carbohydrate derivative binding	molecular_function	1.4663e-11	5.8858e-09	346	2462	2604	29496	ENSMUSG00000054072|ENSMUSG00000029599|ENSMUSG00000078994|ENSMUSG00000063273|ENSMUSG00000031264|ENSMUSG00000028214|ENSMUSG00000029430|ENSMUSG00000022538|ENSMUSG00000074364|ENSMUSG00000028874|ENSMUSG00000026393|ENSMUSG00000029802|ENSMUSG00000022443|ENSMUSG00000024620|ENSMUSG00000022911|ENSMUSG00000028970|ENSMUSG00000024805|ENSMUSG00000027797|ENSMUSG00000026773|ENSMUSG00000024789|ENSMUSG00000062312|…
GO:0008009	chemokine activity	molecular_function	6.7056e-11	2.3072e-08	21	2462	60	29496	ENSMUSG00000020974|ENSMUSG00000035352|ENSMUSG00000005413|ENSMUSG00000021508|ENSMUSG00000019122|ENSMUSG00000020676|ENSMUSG00000029371|ENSMUSG00000031779|ENSMUSG00000035042|ENSMUSG00000029379|ENSMUSG00000058427|ENSMUSG00000035385|ENSMUSG00000029373|ENSMUSG00000018927|ENSMUSG00000000982|ENSMUSG00000018930|ENSMUSG00000021123|ENSMUSG00000029380|ENSMUSG00000029372|ENSMUSG00000035373|ENSMUSG00000061353
GO:0042379	chemokine receptor binding	molecular_function	6.7056e-11	2.3072e-08	21	2462	60	29496	ENSMUSG00000018930|ENSMUSG00000029380|ENSMUSG00000021123|ENSMUSG00000000982|ENSMUSG00000061353|ENSMUSG00000029372|ENSMUSG00000035373|ENSMUSG00000021508|ENSMUSG00000020676|ENSMUSG00000019122|ENSMUSG00000029371|ENSMUSG00000020974|ENSMUSG00000035352|ENSMUSG00000005413|ENSMUSG00000029373|ENSMUSG00000018927|ENSMUSG00000031779|ENSMUSG00000035042|ENSMUSG00000029379|ENSMUSG00000035385|ENSMUSG00000058427
GO:0000166	nucleotide binding	molecular_function	1.1733e-10	3.5153e-08	370	2462	2875	29496	ENSMUSG00000028678|ENSMUSG00000037851|ENSMUSG00000023852|ENSMUSG00000033885|ENSMUSG00000055994|ENSMUSG00000026836|ENSMUSG00000047735|ENSMUSG00000029920|ENSMUSG00000002948|ENSMUSG00000091549|ENSMUSG00000028646|ENSMUSG00000040661|ENSMUSG00000038612|ENSMUSG00000028494|ENSMUSG00000027722|ENSMUSG00000039501|ENSMUSG00000024042|ENSMUSG00000021701|ENSMUSG00000046808|ENSMUSG00000039831|ENSMUSG00000030249|…
GO:1901265	nucleoside phosphate binding	molecular_function	1.1733e-10	3.5153e-08	370	2462	2875	29496	ENSMUSG00000000530|ENSMUSG00000028680|ENSMUSG00000024843|ENSMUSG00000032501|ENSMUSG00000005481|ENSMUSG00000008384|ENSMUSG00000054855|ENSMUSG00000059991|ENSMUSG00000101188|ENSMUSG00000024014|ENSMUSG00000070056|ENSMUSG00000026558|ENSMUSG00000028792|ENSMUSG00000022962|ENSMUSG00000062312|ENSMUSG00000021457|ENSMUSG00000054892|ENSMUSG00000062867|ENSMUSG00000024789|ENSMUSG00000026773|ENSMUSG00000018848|…
GO:0007264	small GTPase mediated signal transduction	biological_process	1.2406e-10	3.5153e-08	83	2462	432	29496	ENSMUSG00000028646|ENSMUSG00000000001|ENSMUSG00000034116|ENSMUSG00000036894|ENSMUSG00000063388|ENSMUSG00000031504|ENSMUSG00000009681|ENSMUSG00000038860|ENSMUSG00000078853|ENSMUSG00000001995|ENSMUSG00000066406|ENSMUSG00000002233|ENSMUSG00000003269|ENSMUSG00000028057|ENSMUSG00000029204|ENSMUSG00000025724|ENSMUSG00000020611|ENSMUSG00000024998|ENSMUSG00000048960|ENSMUSG00000020671|ENSMUSG00000017144|…
GO:0036094	small molecule binding	molecular_function	3.1949e-10	8.55e-08	375	2462	2946	29496	ENSMUSG00000104713|ENSMUSG00000021127|ENSMUSG00000020088|ENSMUSG00000050965|ENSMUSG00000058301|ENSMUSG00000049892|ENSMUSG00000017774|ENSMUSG00000002847|ENSMUSG00000018425|ENSMUSG00000030921|ENSMUSG00000034663|ENSMUSG00000040620|ENSMUSG00000025337|ENSMUSG00000028580|ENSMUSG00000021108|ENSMUSG00000000628|ENSMUSG00000020132|ENSMUSG00000021311|ENSMUSG00000022285|ENSMUSG00000034135|ENSMUSG00000059883|…
GO:1901363	heterocyclic compound binding	molecular_function	4.1183e-10	1.0215e-07	843	2462	7957	29496	ENSMUSG00000027230|ENSMUSG00000053094|ENSMUSG00000008398|ENSMUSG00000049892|ENSMUSG00000033350|ENSMUSG00000050965|ENSMUSG00000005198|ENSMUSG00000020088|ENSMUSG00000033487|ENSMUSG00000038127|ENSMUSG00000104713|ENSMUSG00000001768|ENSMUSG00000021770|ENSMUSG00000002111|ENSMUSG00000039899|ENSMUSG00000018425|Novel00076|ENSMUSG00000026436|ENSMUSG00000037594|ENSMUSG00000002847|ENSMUSG00000028580|ENSMUSG0…
GO:0097159	organic cyclic compound binding	molecular_function	4.2411e-10	1.0215e-07	843	2462	7958	29496	ENSMUSG00000026880|ENSMUSG00000020715|ENSMUSG00000024054|ENSMUSG00000032042|ENSMUSG00000039756|ENSMUSG00000004591|ENSMUSG00000069917|ENSMUSG00000024097|ENSMUSG00000029135|ENSMUSG00000026749|ENSMUSG00000064262|ENSMUSG00000109336|ENSMUSG00000036327|ENSMUSG00000033356|ENSMUSG00000030782|ENSMUSG00000008668|ENSMUSG00000046434|ENSMUSG00000031504|ENSMUSG00000005672|ENSMUSG00000020393|ENSMUSG00000006445|…
GO:0005525	GTP binding	molecular_function	5.1879e-10	1.19e-07	98	2462	572	29496	ENSMUSG00000033335|ENSMUSG00000031504|ENSMUSG00000040253|ENSMUSG00000078853|ENSMUSG00000060126|ENSMUSG00000002233|ENSMUSG00000064262|ENSMUSG00000027947|ENSMUSG00000105504|ENSMUSG00000028057|ENSMUSG00000029204|ENSMUSG00000032042|ENSMUSG00000091549|ENSMUSG00000028646|ENSMUSG00000000001|ENSMUSG00000036894|ENSMUSG00000063388|ENSMUSG00000030249|ENSMUSG00000022184|ENSMUSG00000020132|ENSMUSG00000027293|…
GO:0019001	guanyl nucleotide binding	molecular_function	7.4166e-10	1.6239e-07	99	2462	583	29496	ENSMUSG00000028057|ENSMUSG00000105504|ENSMUSG00000032042|ENSMUSG00000029204|ENSMUSG00000027947|ENSMUSG00000055994|ENSMUSG00000064262|ENSMUSG00000002233|ENSMUSG00000040253|ENSMUSG00000060126|ENSMUSG00000078853|ENSMUSG00000031504|ENSMUSG00000033335|ENSMUSG00000036894|ENSMUSG00000030249|ENSMUSG00000063388|ENSMUSG00000000001|ENSMUSG00000028646|ENSMUSG00000091549|ENSMUSG00000032849|ENSMUSG00000038387|…
GO:0032561	guanyl ribonucleotide binding	molecular_function	1.0859e-09	2.2742e-07	98	2462	580	29496	ENSMUSG00000058013|ENSMUSG00000028580|ENSMUSG00000038387|ENSMUSG00000032849|ENSMUSG00000039264|ENSMUSG00000029169|ENSMUSG00000062421|ENSMUSG00000046768|ENSMUSG00000031917|ENSMUSG00000036943|ENSMUSG00000022184|ENSMUSG00000027293|ENSMUSG00000020132|Novel00671|ENSMUSG00000073555|ENSMUSG00000049892|ENSMUSG00000058301|ENSMUSG00000020088|ENSMUSG00000104713|ENSMUSG00000031880|ENSMUSG00000017144|ENSMUSG0…
GO:0001664	G-protein coupled receptor binding	molecular_function	1.5129e-09	3.0365e-07	24	2462	81	29496	ENSMUSG00000058427|ENSMUSG00000035385|ENSMUSG00000029379|ENSMUSG00000035042|ENSMUSG00000031779|ENSMUSG00000018927|ENSMUSG00000029373|ENSMUSG00000005413|ENSMUSG00000035352|ENSMUSG00000020974|ENSMUSG00000029371|ENSMUSG00000020676|ENSMUSG00000021508|ENSMUSG00000019122|ENSMUSG00000035373|ENSMUSG00000029372|ENSMUSG00000036885|ENSMUSG00000061353|ENSMUSG00000059288|ENSMUSG00000000982|ENSMUSG00000021123|…
GO:0030554	adenyl nucleotide binding	molecular_function	3.8737e-08	7.4639e-06	278	2462	2140	29496	ENSMUSG00000040675|ENSMUSG00000058013|ENSMUSG00000034024|ENSMUSG00000037855|ENSMUSG00000009566|ENSMUSG00000029169|ENSMUSG00000070469|ENSMUSG00000036943|ENSMUSG00000073775|ENSMUSG00000058594|ENSMUSG00000072620|Novel00671|ENSMUSG00000031488|ENSMUSG00000018417|ENSMUSG00000012519|ENSMUSG00000059796|ENSMUSG00000001380|ENSMUSG00000020181|ENSMUSG00000052749|ENSMUSG00000024054|ENSMUSG00000020715|ENSMUSG0…
GO:0016773	phosphotransferase activity, alcohol group as acceptor	molecular_function	5.2761e-08	9.7751e-06	170	2462	1204	29496	ENSMUSG00000020227|ENSMUSG00000026749|ENSMUSG00000033885|ENSMUSG00000004591|ENSMUSG00000026836|ENSMUSG00000020715|ENSMUSG00000022799|ENSMUSG00000061175|Novel00353|ENSMUSG00000099696|ENSMUSG00000022221|ENSMUSG00000019846|ENSMUSG00000003283|ENSMUSG00000029063|ENSMUSG00000051510|ENSMUSG00000021701|ENSMUSG00000006445|ENSMUSG00000035064|ENSMUSG00000005672|ENSMUSG00000002948|ENSMUSG00000031377|ENSMUSG0…
GO:0005524	ATP binding	molecular_function	5.7782e-08	1.0309e-05	273	2462	2103	29496	ENSMUSG00000016528|ENSMUSG00000020941|ENSMUSG00000001674|ENSMUSG00000009772|ENSMUSG00000037921|ENSMUSG00000006728|ENSMUSG00000017999|ENSMUSG00000020190|ENSMUSG00000027829|ENSMUSG00000070327|ENSMUSG00000032547|ENSMUSG00000060477|ENSMUSG00000041187|ENSMUSG00000020611|ENSMUSG00000029480|ENSMUSG00000023341|ENSMUSG00000020700|ENSMUSG00000021408|ENSMUSG00000020869|ENSMUSG00000003228|ENSMUSG00000026479|…
GO:0032559	adenyl ribonucleotide binding	molecular_function	6.3057e-08	1.0848e-05	274	2462	2114	29496	ENSMUSG00000070469|ENSMUSG00000072620|Novel00671|ENSMUSG00000073775|ENSMUSG00000036943|ENSMUSG00000058594|ENSMUSG00000040675|ENSMUSG00000058013|ENSMUSG00000029169|ENSMUSG00000009566|ENSMUSG00000034024|ENSMUSG00000018417|ENSMUSG00000031488|ENSMUSG00000020181|ENSMUSG00000001380|ENSMUSG00000012519|ENSMUSG00000059796|ENSMUSG00000022221|ENSMUSG00000054051|ENSMUSG00000026395|ENSMUSG00000031504|ENSMUSG0…
GO:0035556	intracellular signal transduction	biological_process	6.5947e-08	1.0954e-05	144	2462	979	29496	ENSMUSG00000025429|ENSMUSG00000027087|ENSMUSG00000052681|ENSMUSG00000021676|ENSMUSG00000028214|ENSMUSG00000031264|ENSMUSG00000029430|ENSMUSG00000024290|ENSMUSG00000026821|ENSMUSG00000031453|ENSMUSG00000074364|ENSMUSG00000045094|ENSMUSG00000032502|ENSMUSG00000020387|ENSMUSG00000039960|ENSMUSG00000022911|ENSMUSG00000055723|ENSMUSG00000027797|ENSMUSG00000031799|ENSMUSG00000019832|ENSMUSG00000004451|…
GO:0005125	cytokine activity	molecular_function	1.5633e-07	2.5101e-05	31	2462	152	29496	ENSMUSG00000020676|ENSMUSG00000021508|ENSMUSG00000019122|ENSMUSG00000014599|ENSMUSG00000029371|ENSMUSG00000035352|ENSMUSG00000020974|ENSMUSG00000005413|ENSMUSG00000029373|ENSMUSG00000018927|ENSMUSG00000035042|ENSMUSG00000025746|ENSMUSG00000031779|ENSMUSG00000035385|ENSMUSG00000058427|ENSMUSG00000022285|ENSMUSG00000078578|ENSMUSG00000058755|ENSMUSG00000029379|ENSMUSG00000018930|ENSMUSG00000029380|…
GO:0005634	nucleus	cellular_component	8.2209e-07	0.00012774	350	2462	3058	29496	ENSMUSG00000029229|ENSMUSG00000034422|ENSMUSG00000032548|ENSMUSG00000032035|ENSMUSG00000016087|ENSMUSG00000050919|ENSMUSG00000052684|ENSMUSG00000025270|ENSMUSG00000026222|ENSMUSG00000022052|ENSMUSG00000021171|ENSMUSG00000032280|ENSMUSG00000022623|ENSMUSG00000063851|ENSMUSG00000042622|ENSMUSG00000070808|ENSMUSG00000029599|ENSMUSG00000063550|ENSMUSG00000027395|ENSMUSG00000015748|ENSMUSG00000024513|…
GO:0006468	protein phosphorylation	biological_process	1.9357e-06	0.00029138	116	2462	794	29496	ENSMUSG00000021408|ENSMUSG00000021647|ENSMUSG00000020580|ENSMUSG00000020700|ENSMUSG00000003119|ENSMUSG00000041187|ENSMUSG00000050965|ENSMUSG00000012519|ENSMUSG00000031805|ENSMUSG00000032547|ENSMUSG00000060477|ENSMUSG00000027829|ENSMUSG00000020190|ENSMUSG00000018932|ENSMUSG00000035725|ENSMUSG00000024727|ENSMUSG00000002688|ENSMUSG00000009772|ENSMUSG00000006728|ENSMUSG00000024235|ENSMUSG00000053158|…
GO:0016740	transferase activity	molecular_function	2.6152e-06	0.00038174	446	2462	3930	29496	ENSMUSG00000025270|ENSMUSG00000026393|ENSMUSG00000015143|ENSMUSG00000028874|ENSMUSG00000028633|ENSMUSG00000054008|ENSMUSG00000024620|ENSMUSG00000024359|ENSMUSG00000004356|ENSMUSG00000028970|ENSMUSG00000028763|ENSMUSG00000034422|ENSMUSG00000019866|ENSMUSG00000027797|ENSMUSG00000029229|ENSMUSG00000024805|ENSMUSG00000027875|ENSMUSG00000057143|ENSMUSG00000027395|ENSMUSG00000070808|ENSMUSG00000063851|…
GO:0001071	nucleic acid binding transcription factor activity	molecular_function	3.7818e-06	0.00052048	156	2462	1152	29496	ENSMUSG00000003184|ENSMUSG00000030199|ENSMUSG00000008730|ENSMUSG00000014859|ENSMUSG00000029771|ENSMUSG00000030353|ENSMUSG00000018604|ENSMUSG00000050397|ENSMUSG00000055612|ENSMUSG00000052837|ENSMUSG00000041482|ENSMUSG00000029687|ENSMUSG00000042524|ENSMUSG00000021250|ENSMUSG00000053110|ENSMUSG00000070691|ENSMUSG00000063889|ENSMUSG00000027514|ENSMUSG00000013846|ENSMUSG00000056501|ENSMUSG00000027552|…
GO:0003700	transcription factor activity, sequence-specific DNA binding	molecular_function	3.7818e-06	0.00052048	156	2462	1152	29496	ENSMUSG00000026826|ENSMUSG00000026436|ENSMUSG00000036461|ENSMUSG00000005374|ENSMUSG00000034271|ENSMUSG00000026389|ENSMUSG00000055320|ENSMUSG00000002111|ENSMUSG00000031540|ENSMUSG00000039899|ENSMUSG00000030536|ENSMUSG00000032402|ENSMUSG00000027230|ENSMUSG00000040152|ENSMUSG00000008398|ENSMUSG00000025498|ENSMUSG00000015839|ENSMUSG00000041827|ENSMUSG00000002250|ENSMUSG00000068699|ENSMUSG00000022952|…
GO:0043565	sequence-specific DNA binding	molecular_function	3.9666e-06	0.00053076	101	2462	680	29496	ENSMUSG00000043017|ENSMUSG00000026208|ENSMUSG00000022010|ENSMUSG00000021371|ENSMUSG00000037174|ENSMUSG00000044167|ENSMUSG00000037926|ENSMUSG00000042622|ENSMUSG00000022623|ENSMUSG00000015202|ENSMUSG00000056216|ENSMUSG00000016087|ENSMUSG00000052684|ENSMUSG00000038539|ENSMUSG00000019951|ENSMUSG00000033502|ENSMUSG00000040451|ENSMUSG00000000223|ENSMUSG00000052056|ENSMUSG00000056749|ENSMUSG00000032035|…
GO:0015093	ferrous iron transmembrane transporter activity	molecular_function	5.3725e-06	0.00068104	25	2462	101	29496	ENSMUSG00000028214|ENSMUSG00000063388|ENSMUSG00000073555|ENSMUSG00000027852|ENSMUSG00000036894|ENSMUSG00000030265|ENSMUSG00000068606|ENSMUSG00000040552|ENSMUSG00000064147|ENSMUSG00000054072|ENSMUSG00000031880|ENSMUSG00000059248|ENSMUSG00000054435|ENSMUSG00000082292|ENSMUSG00000021149|ENSMUSG00000064080|ENSMUSG00000028869|ENSMUSG00000039264|ENSMUSG00000030168|ENSMUSG00000069874|ENSMUSG00000017418|…
GO:0015684	ferrous iron transport	biological_process	5.3725e-06	0.00068104	25	2462	101	29496	ENSMUSG00000039264|ENSMUSG00000030168|ENSMUSG00000069874|ENSMUSG00000028869|ENSMUSG00000022538|ENSMUSG00000020132|ENSMUSG00000017418|ENSMUSG00000056515|ENSMUSG00000044864|ENSMUSG00000030265|ENSMUSG00000040552|ENSMUSG00000064147|ENSMUSG00000068606|ENSMUSG00000073555|ENSMUSG00000028214|ENSMUSG00000063388|ENSMUSG00000027852|ENSMUSG00000036894|ENSMUSG00000021149|ENSMUSG00000082292|ENSMUSG00000064080|…
GO:0004672	protein kinase activity	molecular_function	7.8062e-06	0.00096416	128	2462	923	29496	ENSMUSG00000002688|ENSMUSG00000035725|ENSMUSG00000018932|ENSMUSG00000024727|ENSMUSG00000074305|ENSMUSG00000062960|ENSMUSG00000031309|ENSMUSG00000053158|ENSMUSG00000024235|ENSMUSG00000014361|ENSMUSG00000020580|ENSMUSG00000003119|ENSMUSG00000034266|ENSMUSG00000003617|ENSMUSG00000012519|ENSMUSG00000031805|ENSMUSG00000022204|ENSMUSG00000018417|ENSMUSG00000022799|ENSMUSG00000022221|ENSMUSG00000020227|…
GO:0005102	receptor binding	molecular_function	1.4533e-05	0.0017501	127	2462	1017	29496	ENSMUSG00000028001|ENSMUSG00000103502|ENSMUSG00000041124|ENSMUSG00000022102|ENSMUSG00000027007|ENSMUSG00000038676|ENSMUSG00000024053|ENSMUSG00000000982|ENSMUSG00000021133|ENSMUSG00000028459|Novel00545|ENSMUSG00000027399|ENSMUSG00000062960|ENSMUSG00000025856|ENSMUSG00000047592|ENSMUSG00000022651|ENSMUSG00000056076|ENSMUSG00000035373|ENSMUSG00000024810|ENSMUSG00000039239|ENSMUSG00000030172|ENSMUSG0…
GO:0005543	phospholipid binding	molecular_function	1.6186e-05	0.0019016	26	2462	116	29496	ENSMUSG00000022200|ENSMUSG00000001674|ENSMUSG00000024659|ENSMUSG00000025915|ENSMUSG00000033885|ENSMUSG00000037999|ENSMUSG00000021411|ENSMUSG00000020709|ENSMUSG00000071715|ENSMUSG00000086507|ENSMUSG00000032231|ENSMUSG00000008730|ENSMUSG00000029484|ENSMUSG00000021814|ENSMUSG00000053617|ENSMUSG00000019970|ENSMUSG00000021950|ENSMUSG00000029560|ENSMUSG00000040711|ENSMUSG00000006169|ENSMUSG00000015950|…
GO:0002376	immune system process	biological_process	1.7244e-05	0.0019752	67	2462	476	29496	ENSMUSG00000029373|ENSMUSG00000022015|ENSMUSG00000035929|ENSMUSG00000030579|ENSMUSG00000029371|ENSMUSG00000020676|ENSMUSG00000021508|ENSMUSG00000028776|ENSMUSG00000061353|ENSMUSG00000029372|ENSMUSG00000046718|ENSMUSG00000034394|ENSMUSG00000029229|ENSMUSG00000018930|ENSMUSG00000059866|ENSMUSG00000058755|ENSMUSG00000029379|ENSMUSG00000058427|ENSMUSG00000031799|ENSMUSG00000049303|ENSMUSG00000022468|…
GO:0070838	divalent metal ion transport	biological_process	1.7632e-05	0.0019752	34	2462	167	29496	ENSMUSG00000064080|ENSMUSG00000078578|ENSMUSG00000021149|ENSMUSG00000111398|ENSMUSG00000059248|ENSMUSG00000068606|ENSMUSG00000064147|ENSMUSG00000030265|ENSMUSG00000036894|ENSMUSG00000026083|ENSMUSG00000063388|ENSMUSG00000027852|ENSMUSG00000044864|ENSMUSG00000056515|ENSMUSG00000017418|ENSMUSG00000082292|ENSMUSG00000070348|ENSMUSG00000054435|ENSMUSG00000031880|ENSMUSG00000054072|ENSMUSG00000030452|…
GO:0003924	GTPase activity	molecular_function	2.351e-05	0.0025632	68	2462	434	29496	ENSMUSG00000105504|ENSMUSG00000032042|ENSMUSG00000027947|ENSMUSG00000055994|ENSMUSG00000064262|ENSMUSG00000040253|ENSMUSG00000078853|ENSMUSG00000033335|ENSMUSG00000036894|ENSMUSG00000030249|ENSMUSG00000063388|ENSMUSG00000000001|ENSMUSG00000001473|ENSMUSG00000032849|ENSMUSG00000038387|ENSMUSG00000028580|ENSMUSG00000058013|ENSMUSG00000062421|Novel00671|ENSMUSG00000020132|ENSMUSG00000036943|ENSMUSG0…
GO:0003674	molecular_function	molecular_function	2.3945e-05	0.0025632	2195	2462	25001	29496	ENSMUSG00000022218|ENSMUSG00000056071|ENSMUSG00000022329|ENSMUSG00000057530|ENSMUSG00000079243|ENSMUSG00000061175|ENSMUSG00000030077|ENSMUSG00000019487|ENSMUSG00000028678|ENSMUSG00000040158|ENSMUSG00000011179|ENSMUSG00000003665|ENSMUSG00000049103|ENSMUSG00000024737|ENSMUSG00000050164|Novel00263|ENSMUSG00000037225|ENSMUSG00000039501|ENSMUSG00000038612|ENSMUSG00000002948|ENSMUSG00000014361|ENSMUSG0…
8|ENSMUSG00000071644|ENSMUSG00000021477|ENSMUSG00000040322|ENSMUSG00000040236|ENSMUSG00000007041|ENSMUSG00000045534|ENSMUSG00000062997|ENSMUSG00000080268|ENSMUSG00000031538|ENSMUSG00000027177|ENSMUSG00000027360|ENSMUSG00000060594|ENSMUSG00000021675|ENSMUSG00000023045|ENSMUSG00000043017|ENSMUSG00000038482|ENSMUSG00000024451|ENSMUSG00000082292|ENSMUSG00000002289|ENSMUSG00000050708|ENSMUSG0000003251…
GO:0072511	divalent inorganic cation transport	biological_process	2.6643e-05	0.00279	37	2462	191	29496	ENSMUSG00000036894|ENSMUSG00000026083|ENSMUSG00000063388|ENSMUSG00000027852|ENSMUSG00000068606|ENSMUSG00000064147|ENSMUSG00000030265|ENSMUSG00000111398|ENSMUSG00000059248|ENSMUSG00000018171|ENSMUSG00000064080|ENSMUSG00000078578|ENSMUSG00000021149|ENSMUSG00000036295|ENSMUSG00000044864|ENSMUSG00000056515|ENSMUSG00000017418|ENSMUSG00000028214|ENSMUSG00000073555|ENSMUSG00000040552|ENSMUSG00000067219|…
GO:0005126	cytokine receptor binding	molecular_function	3.3628e-05	0.0034465	31	2462	201	29496	ENSMUSG00000018927|ENSMUSG00000024401|ENSMUSG00000029373|ENSMUSG00000022015|ENSMUSG00000035385|ENSMUSG00000058427|ENSMUSG00000029379|ENSMUSG00000035042|ENSMUSG00000019966|ENSMUSG00000031779|ENSMUSG00000025746|ENSMUSG00000029371|ENSMUSG00000020676|ENSMUSG00000021508|ENSMUSG00000035678|ENSMUSG00000019122|ENSMUSG00000005413|ENSMUSG00000035352|ENSMUSG00000028362|ENSMUSG00000020974|ENSMUSG00000005824|…
GO:0003950	NAD+ ADP-ribosyltransferase activity	molecular_function	3.4745e-05	0.0034868	10	2462	25	29496	ENSMUSG00000034422|ENSMUSG00000029826|ENSMUSG00000032392|ENSMUSG00000038507|ENSMUSG00000022906|ENSMUSG00000063268|ENSMUSG00000083179|ENSMUSG00000023249|ENSMUSG00000034640|ENSMUSG00000021948
GO:0043231	intracellular membrane-bounded organelle	cellular_component	4.0032e-05	0.0039354	464	2462	4408	29496	ENSMUSG00000066551|ENSMUSG00000059991|ENSMUSG00000048572|ENSMUSG00000024513|ENSMUSG00000040312|ENSMUSG00000067995|ENSMUSG00000002052|ENSMUSG00000010554|ENSMUSG00000004360|ENSMUSG00000028318|ENSMUSG00000025823|ENSMUSG00000003604|ENSMUSG00000070319|ENSMUSG00000028965|ENSMUSG00000027035|ENSMUSG00000031799|ENSMUSG00000026773|ENSMUSG00000061458|ENSMUSG00000021457|ENSMUSG00000032640|ENSMUSG00000046010|…
GO:0043412	macromolecule modification	biological_process	4.2353e-05	0.0040803	248	2462	2124	29496	ENSMUSG00000057143|ENSMUSG00000032715|ENSMUSG00000028041|ENSMUSG00000031701|ENSMUSG00000046707|ENSMUSG00000027435|ENSMUSG00000037926|ENSMUSG00000027368|ENSMUSG00000024290|ENSMUSG00000031264|ENSMUSG00000020357|ENSMUSG00000029430|ENSMUSG00000028874|ENSMUSG00000026393|ENSMUSG00000050919|ENSMUSG00000029648|ENSMUSG00000039701|ENSMUSG00000024620|ENSMUSG00000027797|ENSMUSG00000058355|ENSMUSG00000026094|…
GO:0043227	membrane-bounded organelle	cellular_component	4.8848e-05	0.0046137	464	2462	4416	29496	ENSMUSG00000036246|ENSMUSG00000026380|ENSMUSG00000018541|ENSMUSG00000041057|ENSMUSG00000016619|ENSMUSG00000028634|ENSMUSG00000022126|ENSMUSG00000041740|ENSMUSG00000038697|ENSMUSG00000041324|ENSMUSG00000026361|ENSMUSG00000050711|ENSMUSG00000104876|ENSMUSG00000063605|ENSMUSG00000037857|ENSMUSG00000038611|ENSMUSG00000022010|ENSMUSG00000039361|ENSMUSG00000034297|ENSMUSG00000021890|ENSMUSG00000027828|…
GO:0005381	iron ion transmembrane transporter activity	molecular_function	5.3114e-05	0.0049202	26	2462	118	29496	ENSMUSG00000039264|ENSMUSG00000030168|ENSMUSG00000018160|ENSMUSG00000069874|ENSMUSG00000028869|ENSMUSG00000022538|ENSMUSG00000020132|ENSMUSG00000017418|ENSMUSG00000056515|ENSMUSG00000044864|ENSMUSG00000030265|ENSMUSG00000040552|ENSMUSG00000064147|ENSMUSG00000068606|ENSMUSG00000027852|ENSMUSG00000028214|ENSMUSG00000063388|ENSMUSG00000073555|ENSMUSG00000036894|ENSMUSG00000021149|ENSMUSG00000082292|…
GO:0016301	kinase activity	molecular_function	5.7749e-05	0.0052486	179	2462	1423	29496	ENSMUSG00000025648|ENSMUSG00000019970|ENSMUSG00000031565|ENSMUSG00000057963|ENSMUSG00000020407|ENSMUSG00000034936|ENSMUSG00000061878|ENSMUSG00000024782|ENSMUSG00000082292|ENSMUSG00000043017|ENSMUSG00000020437|ENSMUSG00000024576|ENSMUSG00000024404|ENSMUSG00000004056|ENSMUSG00000080268|ENSMUSG00000029710|ENSMUSG00000030890|ENSMUSG00000110397|ENSMUSG00000027177|ENSMUSG00000021483|ENSMUSG00000073563|…
GO:0006826	iron ion transport	biological_process	7.0198e-05	0.0062619	26	2462	119	29496	ENSMUSG00000064080|ENSMUSG00000082292|ENSMUSG00000021149|ENSMUSG00000059248|ENSMUSG00000054435|ENSMUSG00000054072|ENSMUSG00000031880|ENSMUSG00000068606|ENSMUSG00000040552|ENSMUSG00000064147|ENSMUSG00000030265|ENSMUSG00000036894|ENSMUSG00000028214|ENSMUSG00000073555|ENSMUSG00000063388|ENSMUSG00000027852|ENSMUSG00000020132|ENSMUSG00000022538|ENSMUSG00000044864|ENSMUSG00000056515|ENSMUSG00000017418|…
GO:0009966	regulation of signal transduction	biological_process	7.5284e-05	0.0065935	47	2462	273	29496	ENSMUSG00000025429|ENSMUSG00000027087|ENSMUSG00000021647|ENSMUSG00000031540|ENSMUSG00000025724|ENSMUSG00000002983|ENSMUSG00000048960|ENSMUSG00000035929|ENSMUSG00000038167|ENSMUSG00000037211|ENSMUSG00000030579|ENSMUSG00000041046|ENSMUSG00000022255|ENSMUSG00000015202|ENSMUSG00000021215|ENSMUSG00000037552|ENSMUSG00000029372|ENSMUSG00000056076|ENSMUSG00000024427|ENSMUSG00000045094|ENSMUSG00000037239|…
GO:0006955	immune response	biological_process	7.9565e-05	0.006844	57	2462	415	29496	ENSMUSG00000018927|ENSMUSG00000029373|ENSMUSG00000022015|ENSMUSG00000024401|ENSMUSG00000035929|ENSMUSG00000027611|ENSMUSG00000035042|ENSMUSG00000030579|ENSMUSG00000073409|ENSMUSG00000029371|ENSMUSG00000021508|ENSMUSG00000028776|ENSMUSG00000020282|ENSMUSG00000020676|ENSMUSG00000054277|ENSMUSG00000035352|ENSMUSG00000061353|ENSMUSG00000006301|ENSMUSG00000006014|ENSMUSG00000035373|ENSMUSG00000056076|…
GO:0010646	regulation of cell communication	biological_process	8.4158e-05	0.0071121	48	2462	282	29496	ENSMUSG00000000384|ENSMUSG00000001995|ENSMUSG00000018008|ENSMUSG00000020021|ENSMUSG00000038860|ENSMUSG00000009681|ENSMUSG00000059456|ENSMUSG00000033542|ENSMUSG00000036885|ENSMUSG00000047714|ENSMUSG00000020108|ENSMUSG00000042284|ENSMUSG00000003269|ENSMUSG00000066406|ENSMUSG00000061654|ENSMUSG00000026979|ENSMUSG00000034664|ENSMUSG00000063480|ENSMUSG00000042377|ENSMUSG00000041773|ENSMUSG00000034116|…
GO:0023051	regulation of signaling	biological_process	0.00010922	0.0090707	48	2462	285	29496	ENSMUSG00000020108|ENSMUSG00000042284|ENSMUSG00000047714|ENSMUSG00000061654|ENSMUSG00000066406|ENSMUSG00000003269|ENSMUSG00000038860|ENSMUSG00000020021|ENSMUSG00000018008|ENSMUSG00000000384|ENSMUSG00000001995|ENSMUSG00000036885|ENSMUSG00000009681|ENSMUSG00000059456|ENSMUSG00000033542|ENSMUSG00000030750|ENSMUSG00000022114|ENSMUSG00000019846|ENSMUSG00000041773|ENSMUSG00000027351|ENSMUSG00000034116|…
GO:0006464	cellular protein modification process	biological_process	0.00013622	0.010936	221	2462	1899	29496	ENSMUSG00000025314|ENSMUSG00000026857|ENSMUSG00000033955|ENSMUSG00000052837|ENSMUSG00000022781|ENSMUSG00000078616|ENSMUSG00000037872|ENSMUSG00000047215|ENSMUSG00000025915|ENSMUSG00000043733|ENSMUSG00000021948|ENSMUSG00000008730|ENSMUSG00000042608|ENSMUSG00000058126|ENSMUSG00000085385|ENSMUSG00000027787|ENSMUSG00000033191|ENSMUSG00000033909|ENSMUSG00000005533|ENSMUSG00000034235|ENSMUSG00000043336|…
GO:0036211	protein modification process	biological_process	0.00013622	0.010936	221	2462	1899	29496	ENSMUSG00000032440|ENSMUSG00000018648|ENSMUSG00000024014|ENSMUSG00000029062|ENSMUSG00000028680|ENSMUSG00000000530|ENSMUSG00000023249|ENSMUSG00000020063|ENSMUSG00000032501|ENSMUSG00000042228|ENSMUSG00000025757|ENSMUSG00000000317|ENSMUSG00000038042|ENSMUSG00000028862|ENSMUSG00000025591|ENSMUSG00000039725|ENSMUSG00000024190|ENSMUSG00000032437|ENSMUSG00000028362|ENSMUSG00000022114|ENSMUSG00000095079|…
GO:0030234	enzyme regulator activity	molecular_function	0.00013894	0.010972	85	2462	635	29496	ENSMUSG00000032344|ENSMUSG00000059991|ENSMUSG00000022582|ENSMUSG00000033955|ENSMUSG00000036995|ENSMUSG00000052632|ENSMUSG00000005054|ENSMUSG00000037999|ENSMUSG00000059657|ENSMUSG00000030220|ENSMUSG00000026896|ENSMUSG00000031799|ENSMUSG00000021298|ENSMUSG00000019961|ENSMUSG00000068794|ENSMUSG00000000318|ENSMUSG00000061353|ENSMUSG00000032115|ENSMUSG00000017002|ENSMUSG00000021952|ENSMUSG00000020901|…
GO:0016070	RNA metabolic process	biological_process	0.00019798	0.015382	469	2462	4410	29496	ENSMUSG00000020430|ENSMUSG00000013846|ENSMUSG00000059248|ENSMUSG00000006732|ENSMUSG00000063889|ENSMUSG00000020930|ENSMUSG00000021018|ENSMUSG00000028010|ENSMUSG00000014496|ENSMUSG00000071637|ENSMUSG00000015053|ENSMUSG00000057367|ENSMUSG00000006705|ENSMUSG00000000318|ENSMUSG00000020205|ENSMUSG00000027285|ENSMUSG00000031939|ENSMUSG00000046167|ENSMUSG00000002129|ENSMUSG00000029771|ENSMUSG00000021109|…
GO:0043167	ion binding	molecular_function	0.00021013	0.016067	742	2462	7154	29496	ENSMUSG00000000317|ENSMUSG00000027412|ENSMUSG00000036940|ENSMUSG00000021392|ENSMUSG00000025894|ENSMUSG00000022234|ENSMUSG00000028163|ENSMUSG00000047821|ENSMUSG00000028341|ENSMUSG00000005667|ENSMUSG00000025199|ENSMUSG00000031871|ENSMUSG00000026896|ENSMUSG00000019832|ENSMUSG00000004451|ENSMUSG00000021149|ENSMUSG00000020134|ENSMUSG00000025184|ENSMUSG00000025185|ENSMUSG00000015134|ENSMUSG00000015112|…
GO:0030246	carbohydrate binding	molecular_function	0.00021466	0.016156	22	2462	106	29496	ENSMUSG00000006014|ENSMUSG00000050335|ENSMUSG00000022799|ENSMUSG00000042228|ENSMUSG00000046794|ENSMUSG00000020154|ENSMUSG00000067279|ENSMUSG00000001123|ENSMUSG00000057329|ENSMUSG00000068699|ENSMUSG00000074221|ENSMUSG00000032939|ENSMUSG00000040055|ENSMUSG00000004364|ENSMUSG00000048534|ENSMUSG00000018425|ENSMUSG00000054408|ENSMUSG00000020363|ENSMUSG00000022468|ENSMUSG00000042363|ENSMUSG00000036698|…
GO:0003677	DNA binding	molecular_function	0.00021987	0.016294	363	2462	3427	29496	ENSMUSG00000034486|ENSMUSG00000058794|ENSMUSG00000050088|ENSMUSG00000033788|ENSMUSG00000054604|ENSMUSG00000037896|ENSMUSG00000004837|ENSMUSG00000009585|ENSMUSG00000033016|ENSMUSG00000025225|ENSMUSG00000040026|ENSMUSG00000016181|ENSMUSG00000044434|ENSMUSG00000038495|ENSMUSG00000022754|ENSMUSG00000025332|ENSMUSG00000064080|ENSMUSG00000053841|ENSMUSG00000074221|ENSMUSG00000021036|ENSMUSG00000025047|…
GO:0098772	molecular function regulator	molecular_function	0.00024064	0.017115	125	2462	984	29496	ENSMUSG00000025132|ENSMUSG00000021770|ENSMUSG00000052749|ENSMUSG00000030536|ENSMUSG00000048960|ENSMUSG00000025724|ENSMUSG00000029664|ENSMUSG00000073418|ENSMUSG00000024998|ENSMUSG00000032199|ENSMUSG00000026594|ENSMUSG00000046447|ENSMUSG00000029722|ENSMUSG00000058301|ENSMUSG00000026832|ENSMUSG00000038167|ENSMUSG00000054277|ENSMUSG00000074570|ENSMUSG00000020181|ENSMUSG00000104713|ENSMUSG00000018583|…
GO:0016772	transferase activity, transferring phosphorus-containing groups	molecular_function	0.00024653	0.017115	268	2462	2325	29496	ENSMUSG00000024079|ENSMUSG00000051495|ENSMUSG00000006169|ENSMUSG00000020561|ENSMUSG00000063388|ENSMUSG00000005320|ENSMUSG00000028028|ENSMUSG00000059456|ENSMUSG00000078945|ENSMUSG00000040274|ENSMUSG00000029217|ENSMUSG00000078853|ENSMUSG00000000384|ENSMUSG00000025324|ENSMUSG00000021385|ENSMUSG00000003228|ENSMUSG00000027947|ENSMUSG00000025060|ENSMUSG00000039954|ENSMUSG00000026864|ENSMUSG00000020700|…
GO:0007010	cytoskeleton organization	biological_process	0.00024733	0.017115	89	2462	670	29496	ENSMUSG00000037926|ENSMUSG00000030816|ENSMUSG00000071713|ENSMUSG00000041025|ENSMUSG00000024677|ENSMUSG00000018909|ENSMUSG00000002897|ENSMUSG00000022336|ENSMUSG00000063605|ENSMUSG00000044562|ENSMUSG00000007836|ENSMUSG00000066129|ENSMUSG00000046841|ENSMUSG00000061410|ENSMUSG00000026064|ENSMUSG00000007946|ENSMUSG00000049775|ENSMUSG00000026313|ENSMUSG00000040260|ENSMUSG00000080268|ENSMUSG00000026361|…
GO:0006915	apoptotic process	biological_process	0.00024872	0.017115	34	2462	194	29496	ENSMUSG00000022255|ENSMUSG00000040782|ENSMUSG00000032280|ENSMUSG00000025888|ENSMUSG00000027381|ENSMUSG00000002983|ENSMUSG00000027087|ENSMUSG00000007659|ENSMUSG00000026031|ENSMUSG00000027314|ENSMUSG00000025887|ENSMUSG00000026029|ENSMUSG00000099974|ENSMUSG00000033538|ENSMUSG00000089929|ENSMUSG00000005533|ENSMUSG00000057789|ENSMUSG00000024521|ENSMUSG00000090394|ENSMUSG00000057367|ENSMUSG00000041920|…
GO:0012501	programmed cell death	biological_process	0.00024872	0.017115	34	2462	194	29496	ENSMUSG00000027314|ENSMUSG00000025887|ENSMUSG00000026029|ENSMUSG00000099974|ENSMUSG00000033538|ENSMUSG00000022255|ENSMUSG00000040782|ENSMUSG00000025888|ENSMUSG00000032280|ENSMUSG00000027381|ENSMUSG00000002983|ENSMUSG00000027087|ENSMUSG00000007659|ENSMUSG00000026031|ENSMUSG00000102037|ENSMUSG00000055994|ENSMUSG00000066406|ENSMUSG00000057329|ENSMUSG00000042284|ENSMUSG00000022514|ENSMUSG00000001156|…
GO:0071840	cellular component organization or biogenesis	biological_process	0.00025427	0.017251	299	2462	2718	29496	ENSMUSG00000034663|ENSMUSG00000025337|ENSMUSG00000070002|ENSMUSG00000021036|ENSMUSG00000028001|ENSMUSG00000021009|ENSMUSG00000071350|ENSMUSG00000040152|ENSMUSG00000027230|ENSMUSG00000058301|ENSMUSG00000020088|ENSMUSG00000006403|ENSMUSG00000036461|ENSMUSG00000060147|ENSMUSG00000025477|ENSMUSG00000026436|ENSMUSG00000022863|ENSMUSG00000073418|ENSMUSG00000039899|ENSMUSG00000049796|ENSMUSG00000000568|…
GO:0044260	cellular macromolecule metabolic process	biological_process	0.00031821	0.021289	829	2462	9109	29496	ENSMUSG00000032440|ENSMUSG00000094989|ENSMUSG00000024493|ENSMUSG00000024140|ENSMUSG00000029062|ENSMUSG00000014444|ENSMUSG00000029642|ENSMUSG00000038074|ENSMUSG00000022876|Novel00257|ENSMUSG00000032344|ENSMUSG00000001767|ENSMUSG00000020250|ENSMUSG00000039191|ENSMUSG00000036885|ENSMUSG00000019851|ENSMUSG00000052305|ENSMUSG00000042228|ENSMUSG00000038042|ENSMUSG00000023027|ENSMUSG00000022205|ENSMUSG0…
GO:0007049	cell cycle	biological_process	0.00033168	0.021887	90	2462	707	29496	ENSMUSG00000037926|ENSMUSG00000071856|ENSMUSG00000020532|ENSMUSG00000056216|ENSMUSG00000054766|ENSMUSG00000042622|ENSMUSG00000023067|ENSMUSG00000022336|ENSMUSG00000063605|ENSMUSG00000027342|ENSMUSG00000029723|ENSMUSG00000022010|ENSMUSG00000002289|ENSMUSG00000026313|ENSMUSG00000060743|ENSMUSG00000026361|ENSMUSG00000080268|ENSMUSG00000052684|ENSMUSG00000071637|ENSMUSG00000035873|ENSMUSG00000026353|…
GO:0000281	mitotic cytokinesis	biological_process	0.00038749	0.024887	21	2462	103	29496	ENSMUSG00000025610|ENSMUSG00000074622|ENSMUSG00000026663|ENSMUSG00000052837|ENSMUSG00000037855|ENSMUSG00000029135|ENSMUSG00000059436|ENSMUSG00000039518|ENSMUSG00000001156|ENSMUSG00000014859|ENSMUSG00000052684|ENSMUSG00000004044|ENSMUSG00000038335|ENSMUSG00000027552|ENSMUSG00000042622|ENSMUSG00000054766|ENSMUSG00000042406|ENSMUSG00000026728|ENSMUSG00000053931|ENSMUSG00000022010|ENSMUSG00000029723
GO:0061640	cytoskeleton-dependent cytokinesis	biological_process	0.00038749	0.024887	21	2462	103	29496	ENSMUSG00000001156|ENSMUSG00000039518|ENSMUSG00000052684|ENSMUSG00000014859|ENSMUSG00000052837|ENSMUSG00000029135|ENSMUSG00000037855|ENSMUSG00000059436|ENSMUSG00000026663|ENSMUSG00000025610|ENSMUSG00000074622|ENSMUSG00000029723|ENSMUSG00000022010|ENSMUSG00000026728|ENSMUSG00000053931|ENSMUSG00000027552|ENSMUSG00000054766|ENSMUSG00000042406|ENSMUSG00000042622|ENSMUSG00000038335|ENSMUSG00000004044
GO:0016310	phosphorylation	biological_process	0.00048256	0.030585	126	2462	1033	29496	ENSMUSG00000034663|ENSMUSG00000062960|ENSMUSG00000016528|ENSMUSG00000074305|ENSMUSG00000035268|ENSMUSG00000031309|ENSMUSG00000014361|ENSMUSG00000021108|ENSMUSG00000024235|ENSMUSG00000020941|ENSMUSG00000053158|ENSMUSG00000006728|ENSMUSG00000009772|ENSMUSG00000002688|ENSMUSG00000024727|ENSMUSG00000035725|ENSMUSG00000018932|ENSMUSG00000020190|ENSMUSG00000027829|ENSMUSG00000060477|ENSMUSG00000032547|…
GO:0000917	barrier septum assembly	biological_process	0.00052379	0.031539	20	2462	98	29496	ENSMUSG00000053931|ENSMUSG00000026728|ENSMUSG00000029723|ENSMUSG00000022010|ENSMUSG00000004044|ENSMUSG00000042622|ENSMUSG00000054766|ENSMUSG00000042406|ENSMUSG00000027552|ENSMUSG00000052684|ENSMUSG00000014859|ENSMUSG00000039518|ENSMUSG00000001156|ENSMUSG00000074622|ENSMUSG00000025610|ENSMUSG00000026663|ENSMUSG00000029135|ENSMUSG00000037855|ENSMUSG00000059436|ENSMUSG00000052837
GO:0032506	cytokinetic process	biological_process	0.00052379	0.031539	20	2462	98	29496	ENSMUSG00000026728|ENSMUSG00000053931|ENSMUSG00000029723|ENSMUSG00000022010|ENSMUSG00000004044|ENSMUSG00000027552|ENSMUSG00000054766|ENSMUSG00000042406|ENSMUSG00000042622|ENSMUSG00000001156|ENSMUSG00000039518|ENSMUSG00000014859|ENSMUSG00000052684|ENSMUSG00000026663|ENSMUSG00000025610|ENSMUSG00000074622|ENSMUSG00000052837|ENSMUSG00000059436|ENSMUSG00000037855|ENSMUSG00000029135
GO:0090529	cell septum assembly	biological_process	0.00052379	0.031539	20	2462	98	29496	ENSMUSG00000059436|ENSMUSG00000029135|ENSMUSG00000037855|ENSMUSG00000052837|ENSMUSG00000074622|ENSMUSG00000025610|ENSMUSG00000026663|ENSMUSG00000014859|ENSMUSG00000052684|ENSMUSG00000039518|ENSMUSG00000001156|ENSMUSG00000042622|ENSMUSG00000042406|ENSMUSG00000054766|ENSMUSG00000027552|ENSMUSG00000004044|ENSMUSG00000029723|ENSMUSG00000022010|ENSMUSG00000053931|ENSMUSG00000026728
GO:1902410	mitotic cytokinetic process	biological_process	0.00052379	0.031539	20	2462	98	29496	ENSMUSG00000053931|ENSMUSG00000026728|ENSMUSG00000029723|ENSMUSG00000022010|ENSMUSG00000004044|ENSMUSG00000042622|ENSMUSG00000054766|ENSMUSG00000042406|ENSMUSG00000027552|ENSMUSG00000052684|ENSMUSG00000014859|ENSMUSG00000039518|ENSMUSG00000001156|ENSMUSG00000025610|ENSMUSG00000074622|ENSMUSG00000026663|ENSMUSG00000029135|ENSMUSG00000037855|ENSMUSG00000059436|ENSMUSG00000052837
GO:0003676	nucleic acid binding	molecular_function	0.00056829	0.033795	551	2462	5528	29496	ENSMUSG00000028069|ENSMUSG00000027514|ENSMUSG00000040584|ENSMUSG00000030753|ENSMUSG00000027968|ENSMUSG00000016559|ENSMUSG00000019577|ENSMUSG00000019961|ENSMUSG00000030199|ENSMUSG00000027882|ENSMUSG00000018040|ENSMUSG00000039377|ENSMUSG00000007812|ENSMUSG00000025580|ENSMUSG00000083087|ENSMUSG00000026254|ENSMUSG00000031465|ENSMUSG00000031626|ENSMUSG00000038214|ENSMUSG00000042742|ENSMUSG00000046139|…
GO:0000910	cytokinesis	biological_process	0.00063113	0.037075	22	2462	113	29496	ENSMUSG00000026728|ENSMUSG00000053931|ENSMUSG00000022010|ENSMUSG00000029723|ENSMUSG00000004044|ENSMUSG00000038335|ENSMUSG00000027552|ENSMUSG00000042622|ENSMUSG00000054766|ENSMUSG00000042406|ENSMUSG00000039518|ENSMUSG00000001156|ENSMUSG00000014859|ENSMUSG00000052684|ENSMUSG00000074622|ENSMUSG00000025610|ENSMUSG00000026663|ENSMUSG00000022514|ENSMUSG00000052837|ENSMUSG00000059436|ENSMUSG00000029135|…
GO:0046915	transition metal ion transmembrane transporter activity	molecular_function	0.00076957	0.044663	34	2462	197	29496	ENSMUSG00000030265|ENSMUSG00000068606|ENSMUSG00000064147|ENSMUSG00000027852|ENSMUSG00000063388|ENSMUSG00000036894|ENSMUSG00000021149|ENSMUSG00000064080|ENSMUSG00000059248|ENSMUSG00000018171|ENSMUSG00000066150|ENSMUSG00000018160|ENSMUSG00000066152|ENSMUSG00000017418|ENSMUSG00000036295|ENSMUSG00000044864|ENSMUSG00000056515|ENSMUSG00000040552|ENSMUSG00000028214|ENSMUSG00000073555|ENSMUSG00000033350|…
GO:0003779	actin binding	molecular_function	0.0008399	0.048102	62	2462	454	29496	ENSMUSG00000073563|ENSMUSG00000048039|ENSMUSG00000062929|ENSMUSG00000025006|ENSMUSG00000027864|ENSMUSG00000032420|ENSMUSG00000040260|ENSMUSG00000049775|ENSMUSG00000007946|ENSMUSG00000026482|ENSMUSG00000007836|ENSMUSG00000026064|ENSMUSG00000061410|ENSMUSG00000039899|ENSMUSG00000002897|ENSMUSG00000001305|ENSMUSG00000018909|ENSMUSG00000039275|ENSMUSG00000031827|ENSMUSG00000044562|ENSMUSG00000020029|…
GO:0051258	protein polymerization	biological_process	0.0008488	0.048102	31	2462	188	29496	ENSMUSG00000046841|ENSMUSG00000002289|ENSMUSG00000031799|ENSMUSG00000041445|ENSMUSG00000050747|ENSMUSG00000053841|ENSMUSG00000058587|ENSMUSG00000020932|ENSMUSG00000039899|ENSMUSG00000059866|ENSMUSG00000027940|ENSMUSG00000041000|ENSMUSG00000004040|ENSMUSG00000026208|ENSMUSG00000006304|ENSMUSG00000032186|ENSMUSG00000000318|ENSMUSG00000035873|ENSMUSG00000066687|ENSMUSG00000079426|ENSMUSG00000039997|…
GO:0008219	cell death	biological_process	0.00087802	0.048167	34	2462	207	29496	ENSMUSG00000000530|ENSMUSG00000001156|ENSMUSG00000042284|ENSMUSG00000022514|ENSMUSG00000102037|ENSMUSG00000066406|ENSMUSG00000055994|ENSMUSG00000057329|ENSMUSG00000034664|ENSMUSG00000005886|ENSMUSG00000026896|ENSMUSG00000038612|ENSMUSG00000021149|ENSMUSG00000057789|ENSMUSG00000090394|ENSMUSG00000024521|ENSMUSG00000057367|ENSMUSG00000041920|ENSMUSG00000089929|ENSMUSG00000005533|ENSMUSG00000099974|…
GO:0016265	death	biological_process	0.00087802	0.048167	34	2462	207	29496	ENSMUSG00000025887|ENSMUSG00000027314|ENSMUSG00000026029|ENSMUSG00000033538|ENSMUSG00000099974|ENSMUSG00000022255|ENSMUSG00000040782|ENSMUSG00000032280|ENSMUSG00000025888|ENSMUSG00000002983|ENSMUSG00000027381|ENSMUSG00000026031|ENSMUSG00000007659|ENSMUSG00000027087|ENSMUSG00000057329|ENSMUSG00000055994|ENSMUSG00000066406|ENSMUSG00000102037|ENSMUSG00000022514|ENSMUSG00000042284|ENSMUSG00000000530|…
GO:1902531	regulation of intracellular signal transduction	biological_process	0.00087995	0.048167	31	2462	167	29496	ENSMUSG00000042284|ENSMUSG00000027314|ENSMUSG00000066406|ENSMUSG00000003269|ENSMUSG00000020021|ENSMUSG00000038860|ENSMUSG00000018008|ENSMUSG00000000384|ENSMUSG00000021215|ENSMUSG00000037552|ENSMUSG00000001995|ENSMUSG00000036885|ENSMUSG00000045094|ENSMUSG00000009681|ENSMUSG00000056076|ENSMUSG00000033542|ENSMUSG00000038167|ENSMUSG00000030579|ENSMUSG00000022255|ENSMUSG00000041773|ENSMUSG00000034116|…
GO:0072509	divalent inorganic cation transmembrane transporter activity	molecular_function	0.00091241	0.049383	47	2462	306	29496	ENSMUSG00000048807|ENSMUSG00000028869|ENSMUSG00000030168|ENSMUSG00000039264|ENSMUSG00000032220|ENSMUSG00000022438|ENSMUSG00000069874|ENSMUSG00000058488|ENSMUSG00000022538|ENSMUSG00000022500|ENSMUSG00000020132|ENSMUSG00000043279|ENSMUSG00000073555|ENSMUSG00000028214|ENSMUSG00000006403|ENSMUSG00000067219|ENSMUSG00000040552|ENSMUSG00000030452|ENSMUSG00000030587|ENSMUSG00000031880|ENSMUSG00000054072|…
GO:0003723	RNA binding	molecular_function	0.00092374	0.04944	129	2462	1158	29496	ENSMUSG00000030942|ENSMUSG00000059248|ENSMUSG00000027514|ENSMUSG00000040584|ENSMUSG00000071644|ENSMUSG00000019577|ENSMUSG00000027968|ENSMUSG00000006333|ENSMUSG00000026254|ENSMUSG00000083087|ENSMUSG00000002129|ENSMUSG00000068882|ENSMUSG00000031320|ENSMUSG00000047215|ENSMUSG00000066058|ENSMUSG00000038214|ENSMUSG00000042742|ENSMUSG00000038762|ENSMUSG00000029066|ENSMUSG00000020116|ENSMUSG00000020594|…

## Sheet: SCI(VX-765)vsSCI(DMSO).
Table SII. Gene Ontology enrichment analysis of upregulated genes in different groups.
GO_accession	Description	Term_type	Over_represented_pValue	Corrected_pValue	DEG_item	DEG_list	Bg_item	Bg_list	Gene_names
GO:0005488	binding	molecular_function	9.8527e-08	0.0004746	560	852	15897	29496	ENSMUSG00000079550|ENSMUSG00000029328|ENSMUSG00000083064|ENSMUSG00000097476|ENSMUSG00000001998|ENSMUSG00000000125|ENSMUSG00000092260|ENSMUSG00000028860|ENSMUSG00000045466|ENSMUSG00000042320|ENSMUSG00000055102|ENSMUSG00000015806|ENSMUSG00000047911|ENSMUSG00000071076|ENSMUSG00000070419|ENSMUSG00000109893|ENSMUSG00000006262|ENSMUSG00000060224|Novel00492|ENSMUSG00000051727|ENSMUSG00000014767|ENSMUSG0…
